# Supplementary material for: Hydrodynamic Effects on Biofilm Development and Recombinant Protein Expression
Source: MDPI journal article supplement (doi:10.3390/microorganisms10050931), 2022-04-29
Supplement: s1 [file s1]

## Supplementary Material

### Flow cell system schematization and experimental procedure

The flow cell system is composed of a recirculating tank (planktonic cells), a vertical flow cell reactor (where biofilms are formed), and centrifuge pumps that allow the circulation of the bacterial suspension. The flow cell reactor is a semi-circular Perspex duct (3.0 cm in diameter and 1.09 m in length) with 21 apertures on its flat wall to fit removable Perspex pieces (coupons) to which polyvinyl chloride (PVC) slides (2 × 1 cm) were glued. The biofilms were developed on the upper faces of the PVC slides that were in contact with the bacterial suspension circulating through the system.

*E. coli* cells were grown by recirculating the bacterial suspension at 30 °C for 7 days at two different flow rates: 255 L h<sup>-1</sup> (*Re* of 4600) and 128 L h<sup>-1</sup> (*Re* of 2300). The recirculating tank was aerated using an air pump (flow rate of 108 L h<sup>-1</sup>) and continuously fed with Terrific Broth (supplemented with 20 µg mL<sup>-1</sup> kanamycin) at a flow rate of 0.025 L h<sup>-1</sup>.

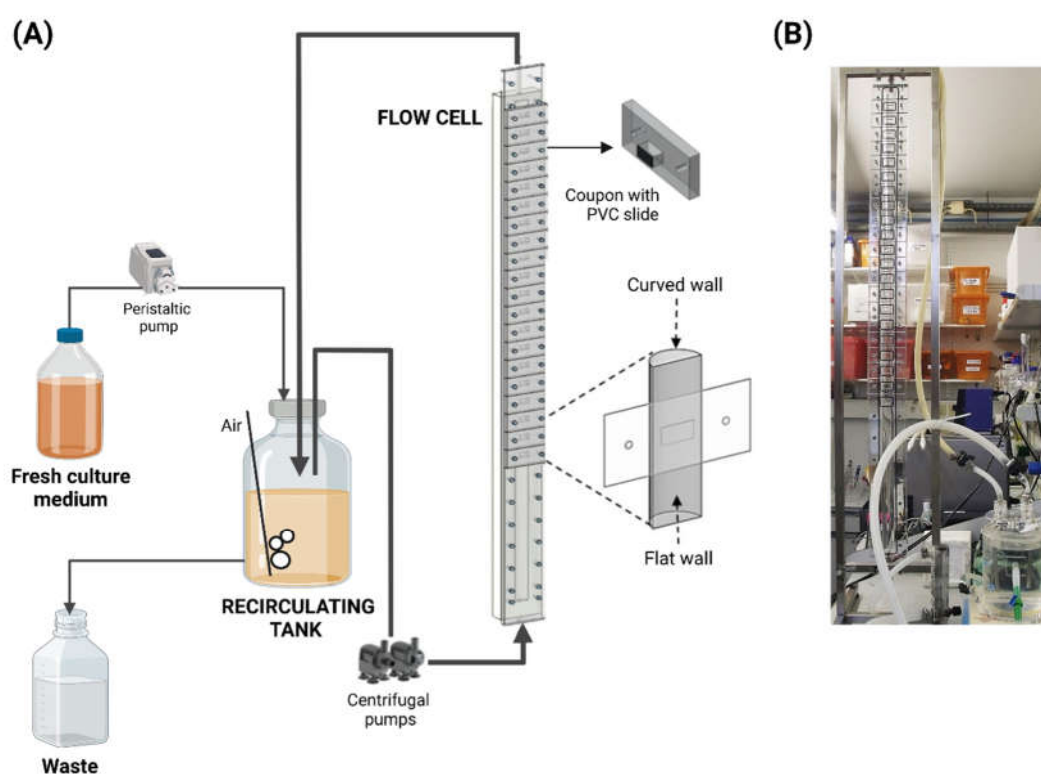

Figure S1. (A) Schematic representation and (B) photograph of the flow cell system.

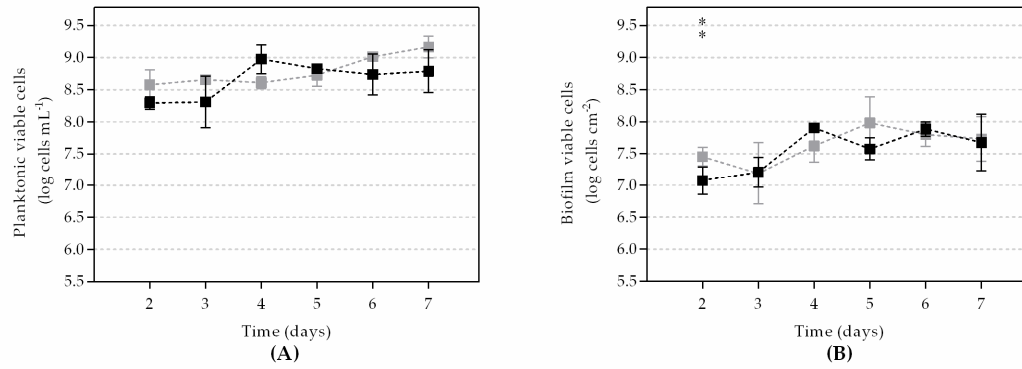

**Figure S2.** Planktonic **(A)** and biofilm **(B)** viable cells at a flow rate of 255 L h<sup>-1</sup> (*Re* of 4600, dark squares) and 128 L h<sup>-1</sup> (*Re* of 2300, grey squares). The means  $\pm$  standard deviations (SDs) for at least three independent experiments are illustrated. Statistical analysis corresponding to each time point is also represented with an asterisk for a confidence level greater than 90% ( $p < 0.1$ ) and with a double asterisk for a confidence level greater than 95% ( $p < 0.05$ ).
